# Supplementary material for: Routes to novel mono- and bis-tetrazole compounds: synthesis, spectroscopic and structural characterization
Source: Royal Society of Chemistry journal article supplement (doi:10.1039/c3nj00090g), 2013-01-01
Supplement: c3nj00090g.pdf [file c3nj00090g.pdf]

## Electronic Supplementary Information

### Routes to new tetrazole compounds: Synthesis, characterization and crystal structure

Yves Boland, Damir A. Safin, Bernard Tinant, Maria G. Babashkina, Jacqueline Marchand-Brynaert and Yann Garcia\*

*Institute of Condensed Matter and Nanosciences, MOST – Inorganic Chemistry, Université Catholique de Louvain, Place L. Pasteur 1, 1348 Louvain-la-Neuve, Belgium. Fax: +32(0) 1047 2330; Tel: +32(0) 1047 2831; E-yann.garcia@uclouvain.be*

**Table S1.** Selected bond lengths (Å) and angles (°) for **2**

| <i>Bond lengths</i>   |             |                         |            |                         |            |
|-----------------------|-------------|-------------------------|------------|-------------------------|------------|
| O(17)–C(16)           | 1.221(3)    | N(4)–C(5)               | 1.299(3)   | N(11)–C(15)             | 1.326(3)   |
| N(1)–N(2)             | 1.344(3)    | N(8)–C(7)               | 1.455(3)   | N(12)–N(13)             | 1.299(3)   |
| N(1)–C(5)             | 1.314(3)    | N(8)–C(9)               | 1.454(3)   | N(13)–N(14)             | 1.351(3)   |
| N(1)–C(6)             | 1.456(3)    | N(8)–C(16)              | 1.337(3)   | N(14)–C(15)             | 1.305(3)   |
| N(2)–N(3)             | 1.282(3)    | N(11)–N(12)             | 1.336(2)   | C(6)–C(7)               | 1.514(3)   |
| N(3)–N(4)             | 1.358(3)    | N(11)–C(10)             | 1.462(3)   | C(9)–C(10)              | 1.520(3)   |
| <i>Bond angles</i>    |             |                         |            |                         |            |
| N(2)–N(1)–C(5)        | 107.63(19)  | C(9)–N(8)–C(16)         | 121.52(18) | N(1)–C(5)–N(4)          | 110.2(2)   |
| N(2)–N(1)–C(6)        | 121.14(18)  | N(12)–N(11)–C(10)       | 121.67(18) | N(1)–C(6)–C(7)          | 111.78(19) |
| C(5)–N(1)–C(6)        | 131.2(2)    | N(12)–N(11)–C(15)       | 107.92(18) | N(8)–C(7)–C(6)          | 112.3(2)   |
| N(1)–N(2)–N(3)        | 106.6(2)    | C(10)–N(11)–C(15)       | 130.40(18) | N(8)–C(9)–C(10)         | 113.05(17) |
| N(2)–N(3)–N(4)        | 110.5(2)    | N(11)–N(12)–N(13)       | 106.07(19) | N(11)–C(10)–C(9)        | 111.48(18) |
| N(3)–N(4)–C(5)        | 105.0(2)    | N(12)–N(13)–N(14)       | 111.2(2)   | N(11)–C(15)–N(14)       | 110.10(19) |
| C(7)–N(8)–C(9)        | 118.49(17)  | N(13)–N(14)–C(15)       | 104.8(2)   | O(17)–C(16)–N(8)        | 125.1(2)   |
| C(7)–N(8)–C(16)       | 119.98(19)  |                         |            |                         |            |
| <i>Torsion angles</i> |             |                         |            |                         |            |
| C(5)–N(1)–N(2)–N(3)   | –0.2(2)     | C(9)–N(8)–C(7)–C(6)     | 81.5(2)    | C(15)–N(11)–C(10)–C(9)  | 83.5(3)    |
| C(6)–N(1)–N(2)–N(3)   | –177.98(19) | C(16)–N(8)–C(7)–C(6)    | –99.4(2)   | N(12)–N(11)–C(15)–N(14) | 0.0(3)     |
| N(2)–N(1)–C(5)–N(4)   | 0.1(3)      | C(7)–N(8)–C(9)–C(10)    | 78.0(2)    | C(10)–N(11)–C(15)–N(14) | –178.9(2)  |
| C(6)–N(1)–C(5)–N(4)   | 177.5(2)    | C(16)–N(8)–C(9)–C(10)   | –101.1(2)  | N(11)–N(12)–N(13)–N(14) | 0.1(3)     |
| N(2)–N(1)–C(6)–C(7)   | 81.7(2)     | C(7)–N(8)–C(16)–O(17)   | –1.8(4)    | N(12)–N(13)–N(14)–C(15) | –0.1(3)    |
| C(5)–N(1)–C(6)–C(7)   | –95.5(3)    | C(9)–N(8)–C(16)–O(17)   | 177.3(2)   | N(13)–N(14)–C(15)–N(11) | 0.1(3)     |
| N(1)–N(2)–N(3)–N(4)   | 0.3(3)      | C(10)–N(11)–N(12)–N(13) | 179.0(2)   | N(1)–C(6)–C(7)–N(8)     | 56.0(3)    |
| N(2)–N(3)–N(4)–C(5)   | –0.3(3)     | C(15)–N(11)–N(12)–N(13) | 0.0(3)     | N(8)–C(9)–C(10)–N(11)   | 67.0(2)    |
| N(3)–N(4)–C(5)–N(1)   | 0.1(3)      | N(12)–N(11)–C(10)–C(9)  | –95.2(2)   |                         |            |

**Table S2.** Selected bond lengths (Å) and angles (°) for **13**

| <i>Bond lengths</i>   |             |                       |             |                        |             |
|-----------------------|-------------|-----------------------|-------------|------------------------|-------------|
| O(10)–C(9)            | 1.358(2)    | N(1)–C(6)             | 1.461(2)    | N(8)–C(9)              | 1.351(2)    |
| O(10)–C(11)           | 1.458(2)    | N(2)–N(3)             | 1.294(2)    | N(8)–C(12)             | 1.456(2)    |
| O(13)–C(9)            | 1.214(2)    | N(3)–N(4)             | 1.363(2)    | C(6)–C(7)              | 1.525(2)    |
| N(1)–N(2)             | 1.3474(16)  | N(4)–C(5)             | 1.315(2)    | C(11)–C(12)            | 1.522(2)    |
| N(1)–C(5)             | 1.334(2)    | N(8)–C(7)             | 1.448(2)    |                        |             |
| <i>Bond angles</i>    |             |                       |             |                        |             |
| C(9)–O(10)–C(11)      | 108.36(12)  | N(3)–N(4)–C(5)        | 105.17(14)  | N(8)–C(7)–C(6)         | 113.34(13)  |
| N(2)–N(1)–C(5)        | 108.14(13)  | C(7)–N(8)–C(9)        | 122.01(13)  | O(10)–C(9)–O(13)       | 122.26(15)  |
| N(2)–N(1)–C(6)        | 121.37(13)  | C(7)–N(8)–C(12)       | 123.44(13)  | O(10)–C(9)–N(8)        | 109.91(14)  |
| C(5)–N(1)–C(6)        | 130.40(13)  | C(9)–N(8)–C(12)       | 111.31(12)  | O(13)–C(9)–N(8)        | 127.82(15)  |
| N(1)–N(2)–N(3)        | 106.36(13)  | N(1)–C(5)–N(4)        | 109.36(14)  | O(10)–C(11)–C(12)      | 104.54(13)  |
| N(2)–N(3)–N(4)        | 110.96(14)  | N(1)–C(6)–C(7)        | 111.85(13)  | N(8)–C(12)–C(11)       | 100.15(14)  |
| <i>Torsion angles</i> |             |                       |             |                        |             |
| C(5)–N(1)–N(2)–N(3)   | –0.03(17)   | N(3)–N(4)–C(5)–N(1)   | 0.40(17)    | C(7)–N(8)–C(12)–C(11)  | 178.93(13)  |
| C(6)–N(1)–N(2)–N(3)   | 176.81(13)  | C(9)–N(8)–C(7)–C(6)   | –90.14(18)  | C(9)–N(8)–C(12)–C(11)  | –21.10(16)  |
| N(2)–N(1)–C(5)–N(4)   | –0.24(18)   | C(12)–N(8)–C(7)–C(6)  | 67.75(19)   | N(1)–C(6)–C(7)–N(8)    | 63.41(17)   |
| C(6)–N(1)–C(5)–N(4)   | –176.71(15) | C(7)–N(8)–C(9)–O(10)  | 171.01(13)  | O(13)–C(9)–O(10)–C(11) | –173.16(15) |
| N(2)–N(1)–C(6)–C(7)   | –85.93(17)  | C(7)–N(8)–C(9)–O(13)  | –10.2(2)    | N(8)–C(9)–O(10)–C(11)  | 5.67(17)    |
| C(5)–N(1)–C(6)–C(7)   | 90.15(19)   | C(12)–N(8)–C(9)–O(10) | 10.71(18)   | C(12)–C(11)–O(10)–C(9) | –18.63(16)  |
| N(1)–N(2)–N(3)–N(4)   | 0.30(17)    | C(12)–N(8)–C(9)–O(13) | –170.53(16) | O(10)–C(11)–C(12)–N(8) | 22.98(15)   |
| N(2)–N(3)–N(4)–C(5)   | –0.44(18)   |                       |             |                        |             |
